# Supplementary material
Source: publisher figshare collection journal article supplement (https://gsajournals.figshare.com/ndownloader/files/12272738)
Supplement: Supplementary file 1 [file 12272738]

## Sheet: Plan1
Supplementary Material 1: Information on 188 common bean genotypes used in the molecular characterization of DArT and DArtSeq markers, commercial type of grain, gene pool origin, type of germplasm and institution of origin.
Germplasm bank ID	Common name	Gene Pool	Germplasm stratum	Origin	Commercial grain type
BRS Cometa	BRS Cometa	Mesoamerican	cultivars/elite lines	Brazil	carioca*
BRS Pontal	BRS Pontal	Mesoamerican	cultivars/elite lines	Brazil	carioca*
CF200002	Gurgutuba Vermelho	Andean	landrace	Brazil	rajado*
CF200003	Enxofre	Mesoamerican	landrace	Brazil	yellow
CF200005	Mudubim de Vara	Mesoamerican	landrace	Brazil	carioca*
CF200006	Vermelho de Caratinha	Mesoamerican	landrace	Brazil	red
CF200007	Carioca Caneludo	Mesoamerican	landrace	Brazil	carioca*
CF200008	Bagem Amare	Andean	landrace	Brazil	red
CF200009	Cavalo Fosco	Andean	landrace	Brazil	purple
CF200010	Caboclinho Roxo	Mesoamerican	landrace	Brazil	rosinha*
CF200011	Preto Graúdo	Andean	landrace	Brazil	black
CF200012	Azulão	Mesoamerican	landrace	Brazil	black
CF200013	Taquara	Mesoamerican	landrace	Brazil	black
CF200015	Graúdo	Mesoamerican	landrace	Brazil	black
CF200018	Bagem Roxa	Mesoamerican	landrace	Brazil	black
CF200019	Taquara	Mesoamerican	landrace	Brazil	black
CF200042	Rio Negro	Mesoamerican	landrace	Brazil	black
CF200043	Carioquinha Antigo	Mesoamerican	landrace	Brazil	carioca*
CF200044	Cavalinho	Andean	landrace	Brazil	rajado*
CF200044	Cavalinho	Andean	landrace	Brazil	rajado*
CF200048	Cavalo Claro	Andean	landrace	Brazil	rajado*
CF200051	Crioulo Pintado	Andean	landrace	Brazil	others**
CF200056	Gurgutuba Branco	Andean	landrace	Brazil	others**
CF200059	Tubiano	Andean	landrace	Brazil	rajado*
CF200060	Pintado	Andean	landrace	Brazil	others**
CF200067	Enxofre/Amarelo	Andean	landrace	Brazil	yellow
CF200067	Enxofre/Amarelo	Andean	landrace	Brazil	yellow
CF200068	Coquinho/Enxofre	Andean	landrace	Brazil	yellow
CF200070	Mourinho	Mesoamerican	landrace	Brazil	brown
CF200071	Mourinho	Mesoamerican	landrace	Brazil	black
CF200072	Mistura de Pérola	Mesoamerican	landrace	Brazil	carioca*
CF200073	Vagem Trepadeira	Mesoamerican	landrace	Brazil	brown
CF200074	Mourinho	Mesoamerican	landrace	Brazil	others**
CF200075	Mouro	Mesoamerican	landrace	Brazil	others**
CF200082	Amendoim	Mesoamerican	landrace	Brazil	red
CF200086	Rosinha	Mesoamerican	landrace	Brazil	rosinha*
CF200090	Rapé	Mesoamerican	landrace	Brazil	others**
CF210002	Rapezinho Brilhante	Mesoamerican	landrace	Brazil	brown
CF220276	Carioca 75 Dias	Mesoamerican	landrace	Brazil	carioca*
CF220279	Preto 1 Epamig	Mesoamerican	landrace	Brazil	black
CF220283	Manteigão Fosco 3 Epamig	Andean	landrace	Brazil	mulatinho*
CF230005	Crioulo Taquara	Andean	landrace	Brazil	black
CF230029	Amarelinho	Mesoamerican	landrace	Brazil	yellow
CF240002	Feijão Ashaninka	Mesoamerican	landrace	Brazil	rosinha*
CF240005	Carioca Antigo	Mesoamerican	landrace	Brazil	carioca*
CF240013	Rapa Cuia	Mesoamerican	landrace	Brazil	brown
CF240020	Gargaú	Mesoamerican	landrace	Brazil	mulatinho*
CF240021	Panela Cheia	Andean	landrace	Brazil	rosinha*
CF240029	Americano	Andean	landrace	Brazil	red
CF240048	Rosinha	Mesoamerican	landrace	Brazil	rosinha*
CF240050	Manteiga Vermelhinho	Andean	landrace	Brazil	purple
CF240060	Guabijú	Andean	landrace	Brazil	black
CF240065	Vermelho Graúdo	Andean	landrace	Brazil	red
CF240074	Carioca Sem Identificação	Mesoamerican	landrace	Brazil	rosinha*
CF240080	Nova Planta	Mesoamerican	landrace	Brazil	brown
CF240084	Vermelho 90 Dias	Mesoamerican	landrace	Brazil	red
CF240097	Ouro Vermelho	Mesoamerican	landrace	Brazil	red
CF240107	Tico Tico Legítimo	Andean	landrace	Brazil	rajado*
CF800003	Mulatinho	Mesoamerican	landrace	Brazil	mulatinho*
CF800004	Roxo	Mesoamerican	landrace	Brazil	purple
CF800015	Roxinho e Chumbinho	Mesoamerican	landrace	Brazil	rosinha*
CF800017	Mulatinho	Mesoamerican	landrace	Brazil	mulatinho*
CF800027	Mistura de Tipos	Mesoamerican	landrace	Brazil	purple
CF800031	Carioca	Mesoamerican	landrace	Brazil	carioca*
CF800032	Jalo	Mesoamerican	landrace	Brazil	carioca*
CF800049	Amendoim	Andean	landrace	Brazil	rajado*
CF800111	Rosinha	Mesoamerican	landrace	Brazil	rosinha*
CF800121	Desconhecido	Mesoamerican	landrace	Brazil	brown
CF800130	Rio Tibagi	Mesoamerican	landrace	Brazil	black
CF800356	Tipo Vagem	Andean	landrace	Brazil	rajado*
CF810085	Jalo	Andean	landrace	Brazil	yellow
CF810313	Come Calado	Mesoamerican	landrace	Brazil	others**
CF810320	Mulatinho/Favinha	Mesoamerican	landrace	Brazil	mulatinho*
CF810415	Chileno	Andean	landrace	Brazil	mulatinho*
CF830185	Preto Brilhante	Mesoamerican	landrace	Brazil	black
CF840014	Feijão de Vagem Graúdo	admixture	landrace	Brazil	carioca*
CF840024	Marrom de Vagem	Mesoamerican	landrace	Brazil	brown
CF840151	Chileno Branco	Andean	landrace	Brazil	white
CF840222	Chumbinho Roxo	Mesoamerican	landrace	Brazil	black
CF840275	Branco Graúdo	Mesoamerican	landrace	Brazil	white
CF840278	De Vagem Brilhante	Mesoamerican	landrace	Brazil	brown
CF840279	Malhado de Vagem	admixture	landrace	Brazil	others**
CF840328	Brilhante Graúdo	Mesoamerican	landrace	Brazil	black
CF840404	Carioquinha de Produtor	Mesoamerican	landrace	Brazil	carioca*
CF840650	Roxão	Andean	landrace	Brazil	others**
CF840725	Campuçal Vermelho	Andean	landrace	Brazil	red
CF840745	Vermelhinho	Andean	landrace	Brazil	red
CF840746	Rim de Paca	Andean	landrace	Brazil	red
CF860079	Amarelinho Trepador	Mesoamerican	landrace	Brazil	yellow
CF870138	Amendoim Vermelho	Andean	landrace	Brazil	red
CF870147	Roxinho	Mesoamerican	landrace	Brazil	rajado*
CF871133	Jalo	Andean	landrace	Brazil	others**
CF890193	Carioca sem Cipó	Mesoamerican	landrace	Brazil	carioca*
CNF000480	Ouro Negro	Mesoamerican	cultivars/elite lines	Brazil	black
CNF000784	Georgia	admixture	cultivars/elite lines	Russia	rajado*
CNF000840	PI 226 895- MONT D'OR	Andean	cultivars/elite lines	France	black
CNF000878	Creme ou Feijão Argentino	Andean	cultivars/elite lines	Argentina	yellow
CNF001569	Pecho Amarillo	Mesoamerican	cultivars/elite lines	Guatemala	black
CNF001574	Mont Calm	Andean	cultivars/elite lines	USA	red
CNF001591	G 01422 - Genfor Markt	Mesoamerican	cultivars/elite lines	Germany	black
CNF001602	Black Wonder	Andean	cultivars/elite lines	South Africa	black
CNF001611	Idaho Refugee	admixture	cultivars/elite lines	USA	rajado*
CNF002017	Windsor Long Pod	Andean	cultivars/elite lines	Australia	purple
CNF002023	Saint Marcellin	Andean	cultivars/elite lines	Chile	black
CNF003730	Mayocoba	Andean	cultivars/elite lines	Mexico	yellow
CNF004514	Capixaba Precoce (BAT 403)	Mesoamerican	cultivars/elite lines	Colombia	black
CNF004582	LM 00219-0	Mesoamerican	cultivars/elite lines	Brazil	black
CNF004640	Varre Sai	Mesoamerican	cultivars/elite lines	Brazil	black
CNF004681	Ipa 10	Mesoamerican	cultivars/elite lines	Colombia	black
CNF004856	Emgopa 202 Rubi	Mesoamerican	cultivars/elite lines	Brazil	rosinha*
CNF004947	Jalo EEP 558	Andean	cultivars/elite lines	Brazil	others**
CNF005001	Preto e Branco Uruguai	Andean	cultivars/elite lines	Uruguay	others**
CNF005460	Round Speckled Sugar	Andean	cultivars/elite lines	South Africa	rajado*
CNF005482	AN 3508	Mesoamerican	cultivars/elite lines	Brazil	black
CNF005494	Macanudo	Mesoamerican	cultivars/elite lines	Brazil	black
CNF005520	Corrente	Mesoamerican	cultivars/elite lines	Brazil	mulatinho*
CNF005598	Empasc 201 Chapecó	Mesoamerican	cultivars/elite lines	Brazil	black
CNF005601	EPABA 1	Mesoamerican	cultivars/elite lines	Brazil	mulatinho*
CNF005613	Iapar 14	Mesoamerican	cultivars/elite lines	Brazil	carioca*
CNF005823	LA 720172	Mesoamerican	cultivars/elite lines	Brazil	rajado*
CNF005824	Aporé	Mesoamerican	cultivars/elite lines	Brazil	carioca*
CNF005887	Encapa 405 Goytacazes	Mesoamerican	cultivars/elite lines	Brazil	carioca*
CNF005923	Diamante Negro	Mesoamerican	cultivars/elite lines	Brazil	black
CNF005929	LA 720164	Mesoamerican	cultivars/elite lines	Brazil	black
CNF006141	Ouro Branco	Andean	cultivars/elite lines	Brazil	white
CNF006514	Canadian Wonder	Mesoamerican	cultivars/elite lines	USA	purple
CNF006715	Jatu Rong	Andean	cultivars/elite lines	India	rajado*
CNF006760	Ipa 7	Mesoamerican	cultivars/elite lines	Brazil	mulatinho*
CNF006772	AN 730038	Mesoamerican	cultivars/elite lines	Brazil	carioca*
CNF006872	AN 911120	Mesoamerican	cultivars/elite lines	Brazil	black
CNF006978	Balina de Albenga	Andean	cultivars/elite lines	Argentina	rajado*
CNF006979	Alubia Cerrillos	admixture	cultivars/elite lines	Argentina	white
CNF007050	Roxo 90	Mesoamerican	cultivars/elite lines	Brazil	purple
CNF007057	Xamego	Mesoamerican	cultivars/elite lines	Brazil	black
CNF007090	MA 733327	Mesoamerican	cultivars/elite lines	Brazil	black
CNF007098	PF 9029984	Mesoamerican	cultivars/elite lines	Brazil	carioca*
CNF007131	Iapar 31	Mesoamerican	cultivars/elite lines	Brazil	others**
CNF007135	Bambuí	Mesoamerican	cultivars/elite lines	Brazil	mulatinho*
CNF007137	Porto Real (FT 85-75)	Mesoamerican	cultivars/elite lines	Brazil	carioca*
CNF007143	AN 9021334	Mesoamerican	cultivars/elite lines	Brazil	black
CNF007359	AN 910911	Mesoamerican	cultivars/elite lines	Brazil	black
CNF007381	Gyza 0006	admixture	cultivars/elite lines	Egypt	white
CNF007382	Iapar 65	Mesoamerican	cultivars/elite lines	Brazil	black
CNF007533	IAC Maravilha	Mesoamerican	cultivars/elite lines	Brazil	black
CNF007552	BRS Vereda	Mesoamerican	cultivars/elite lines	Brazil	rosinha*
CNF007559	BRS Agreste	Mesoamerican	cultivars/elite lines	Brazil	mulatinho*
CNF007569	LM 93204328	Mesoamerican	cultivars/elite lines	Brazil	carioca*
CNF007606	BRS Radiante	Andean	cultivars/elite lines	Brazil	rajado*
CNF007646	Borlotto Climbing	Andean	cultivars/elite lines	Italy	rajado*
CNF007648	Coco Nicois	Andean	cultivars/elite lines	France	rajado*
CNF007659	Royal Red	Andean	cultivars/elite lines	USA	purple
CNF007666	Kievitsboon Batenburg	Andean	cultivars/elite lines	Netherlands	rajado*
CNF007672	Poucha Rosada	Andean	cultivars/elite lines	Venezuela	rajado*
CNF007800	IAC Una	Mesoamerican	cultivars/elite lines	Colombia	black
CNF007806	BRS Requinte	Mesoamerican	cultivars/elite lines	Brazil	carioca*
CNF007813	CNF007813	Andean	cultivars/elite lines	Brazil	carioca*
CNF007844	IAC Akytã	Mesoamerican	cultivars/elite lines	Brazil	carioca*
CNF007845	IAC Aruã	Mesoamerican	cultivars/elite lines	Brazil	carioca*
CNF007866	BRS Pitanga	Mesoamerican	cultivars/elite lines	Brazil	purple
CNF007893	IAC Bico de Ouro	Mesoamerican	cultivars/elite lines	Brazil	mulatinho*
CNF007904	Carioca Pitoco	Mesoamerican	cultivars/elite lines	Brazil	carioca*
CNF007907	FT Nobre	Mesoamerican	cultivars/elite lines	Brazil	black
CNF008104	BRS Campeiro	Mesoamerican	cultivars/elite lines	Brazil	black
CNF008202	BRS Horizonte	Mesoamerican	cultivars/elite lines	Brazil	carioca*
CNF008782	Nicaragua 0105	Andean	cultivars/elite lines	Nicaragua	purple
CNF009299	P. Chileno	Andean	cultivars/elite lines	Panama	rajado*
CNF009595	Iapar 81	Mesoamerican	cultivars/elite lines	Brazil	carioca*
CNF009846	Kidney Moteados SC	Andean	cultivars/elite lines	Colombia	rajado*
CNF010003	Uirapuru	Mesoamerican	cultivars/elite lines	Brazil	black
CNF010015	BRSMG Talismã	Andean	cultivars/elite lines	Brazil	carioca*
CNF010316	BAT 477	Mesoamerican	cultivars/elite lines	Colombia	mulatinho*
CNF010324	Iapar 72	Mesoamerican	cultivars/elite lines	Brazil	carioca*
CNF011035	Gentry Retinto Dulce	Mesoamerican	cultivars/elite lines	Honduras	others**
CNF011036	Kodate Zairai	Mesoamerican	cultivars/elite lines	Japan	brown
CNF011201	Line 0132	Andean	cultivars/elite lines	Colombia	rajado*
CNF011205	L. V. Peters 275	Andean	cultivars/elite lines	Uganda	others**
CNF011274	Alubia	Mesoamerican	cultivars/elite lines	Spain	white
CNF011324	Mbono	Andean	cultivars/elite lines	Zaire	brown
CNF011332	Local of Khomein	Andean	cultivars/elite lines	Iran	rajado*
CNF011351	G 14388	Andean	cultivars/elite lines	Camaroon	black
CNF011368	Velazco Largo	Andean	cultivars/elite lines	Cuba	purple
CNF011370	Frutilla Cañete	Andean	cultivars/elite lines	Colombia	rajado*
CNF011463	Piligue	Andean	cultivars/elite lines	Guatemala	purple
CNF011527	Muransiraki	Andean	cultivars/elite lines	Uganda	others**
CNF011707	Feijão Branco	admixture	cultivars/elite lines	Chile	white
CNF011743	Guapó Brilhante	Mesoamerican	cultivars/elite lines	Brazil	black
Guará	Guará	Mesoamerican	cultivars/elite lines	Brazil	carioca*
IAC Diplomata	IAC Diplomata	Mesoamerican	cultivars/elite lines	Brazil	black
*Brazilian commercial grain type name
**Commercial grain type not defined
